# Supplementary material for: Risk estimates of mortality attributed to low concentrations of ambient fine particulate matter in the Canadian community health survey cohort
Source: PubMed Central journal article supplement (PMC4750218; doi:10.1186/s12940-016-0111-6), 2016-02-11
Supplement: 12940_2016_111_MOESM1_ESM.pdf [file 12940_2016_111_MOESM1_ESM.pdf]

**Interviewed in CCHS**

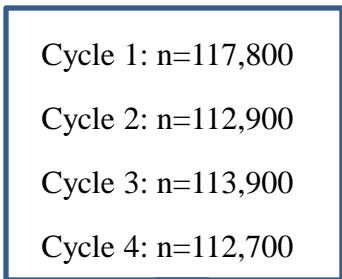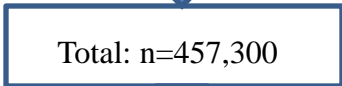

**Linkage Project**

Linkage to HTSF (tax file):  
Needed for probabilistic linkage

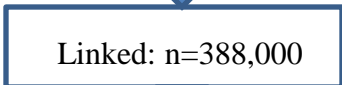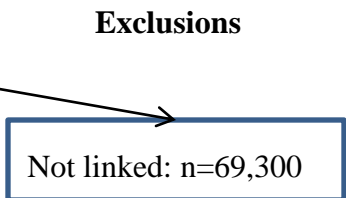

**Additional Exclusions**

Age

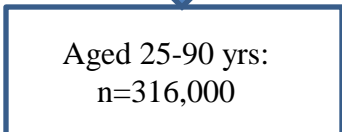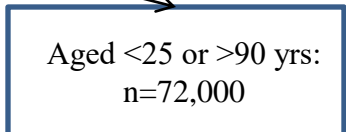

Immigrant status

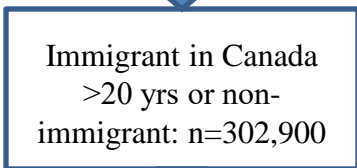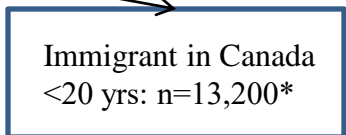

Geographic – matching to PM2.5

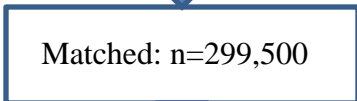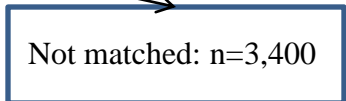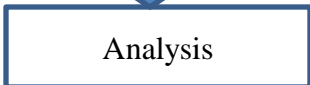

\*mathematical inconsistency due to rounding.
